# Supplementary material
Source: MDPI journal article supplement (https://www.mdpi.com/1999-4907/10/4/334)
Supplement: s1 [file s1]

Table S2 Fixation index and F-statistics in *L.chinense* and *L.tulipifera*

| Locus   | <i>L.chinense</i> ( n = 35 ) |        | <i>L.tulipifera</i> ( n= 13 ) |        |
|---------|------------------------------|--------|-------------------------------|--------|
|         | Fis                          | Fst    | Fis                           | Fst    |
| ESSR8   | -0.7485                      | 0.0969 | -0.6981                       | 0.2838 |
| ESSR12  | -0.9478                      | 0.1914 | -0.8367                       | 0.0316 |
| ESSR26  | 1                            | 0.548  | 1                             | 0.5862 |
| ESSR27  | 1                            | 0.5538 | 1                             | 0.6026 |
| ESSR77  | -0.4227                      | 0.2402 | -0.5789                       | 0.2061 |
| ESSR92  | 0.2413                       | 0.7392 | -0.7872                       | 0.0167 |
| ESSR118 | 0.0268                       | 0.5081 | 0.562                         | 0.5213 |
| SSR131  | -0.6504                      | 0.1291 | -1                            | 0      |
| ESSR10  | -0.8344                      | 0.1802 | -0.6981                       | 0.0502 |
| ESSR39  | -0.8736                      | 0.1005 | -1                            | 0      |
| ESSR51  | -0.7446                      | 0.0944 | -0.8274                       | 0.0972 |
| ESSR54  | -0.5824                      | 0.2118 | -0.7872                       | 0.0524 |
| ESSR72  | -0.6689                      | 0.1797 | -0.6071                       | 0.1789 |
| ESSR82  | -0.6045                      | 0.2766 | -0.6981                       | 0.1077 |
| ESSR87  | -0.673                       | 0.206  | -0.377                        | 0.0976 |
| ESSR90  | 0.0919                       | 0.5223 | 0.1429                        | 0.2391 |
| ESSR93  | -0.0394                      | 0.3147 | -0.7647                       | 0.213  |
| ESSR96  | -0.726                       | 0.1072 | -1                            | 0      |
| ESSR97  | 0.4864                       | 0.5276 | -0.2                          | 0.25   |
| ESSR107 | -0.0815                      | 0.4441 | 0.4286                        | 0.4368 |
| ESSR110 | -0.5175                      | 0.3256 | -0.5126                       | 0.2192 |
| ESSR116 | -1                           | 0      | -0.6981                       | 0.1693 |
| ESSR119 | -1                           | 0      | -1                            | 0      |
| ESSR124 | 1                            | 0.5407 | -0.0256                       | 0.503  |
| ESSR127 | -0.9299                      | 0.2759 | -0.75                         | 0.0476 |
| ESSR132 | -0.6765                      | 0.2498 | -0.5254                       | 0.1896 |
| ESSR133 | -0.4978                      | 0.2139 | -0.8367                       | 0.0316 |
| ESSR149 | 1                            | 0.3171 | 1                             | 0.6269 |
| ESSR197 | -0.2074                      | 0.4102 | 0.5                           | 0.5238 |
| Mean    | -0.4681                      | 0.2958 | -0.5049                       | 0.2214 |

F<sub>IS</sub>= fixation index; F<sub>ST</sub>= F-statistics
