# Supplementary material
Source: MDPI journal article supplement (https://www.mdpi.com/1999-4907/10/4/334)
Supplement: s1 [file s1]

Table S5. Shannon's information index (I) analysed by SSR markers

| Population               | ID | <i>I (Mean)</i> | <i>St.DEV</i> |
|--------------------------|----|-----------------|---------------|
| Liuyang, Hunan Prov.     | 1  | 0.9855          | 0.436         |
| Suining, Hunan Prov.     | 2  | 0.6095          | 0.3892        |
| Youyang, Sichuan Prov.   | 3  | 0.9543          | 0.4645        |
| Songyang, Zhejiang Prov. | 4  | 1.0789          | 0.3809        |
| Liping, Guizhou Prov.    | 5  | 0.8686          | 0.3946        |
| Huangshan, Anhui Prov.   | 6  | 0.5019          | 0.3153        |
| Sangzhi, Hunan Prov.     | 7  | 0.4541          | 0.3353        |
| Lushan, Jiangxi Prov.    | 8  | 0.4541          | 0.3353        |
| Xuyong, Sichuan Prov.    | 9  | 0.7962          | 0.3961        |
| Exi region Hubei Prov.   | 10 | 0.7957          | 0.4443        |
| Songtao, Guizhou Prov.   | 11 | 0.8067          | 0.4321        |
| Mengla, Yunan Prov.      | 12 | 0.8432          | 0.4137        |
| Wuyishan, Jiangxi Prov.  | 13 | 0.8252          | 0.3931        |
| Dabieshan, Anhui Prov.   | 14 | 0.5559          | 0.4811        |
| North Carolina, U.S.A    | 15 | 0.9487          | 0.3156        |
| Louisiana, U.S.A         | 16 | 0.5391          | 0.2937        |
| Georgia, U.S.A           | 17 | 0.8484          | 0.3208        |
| South Carolina, U.S.A    | 18 | 0.8403          | 0.4072        |
| Missouri, U.S.A          | 19 | 0.6672          | 0.3865        |

*I*, Shannon's information index.
