# Supplementary material
Source: MDPI journal article supplement (https://www.mdpi.com/1999-4907/10/4/334)
Supplement: s1 [file s1]

Table S4. F-statistics analysis in three different *L.chinense* populations(Eastern China region, Sichuan Province, Yunan-Guizhou region ) and *L.tulipifera* populations

| Locus | <i>L. chinense</i> |        |               |        |               |        | <i>L.tulipifera</i> |        |
|-------|--------------------|--------|---------------|--------|---------------|--------|---------------------|--------|
|       | Eastern China      |        | Sichuan Prov, |        | Yunan-Guizhou |        | Sample Size         | Fst    |
|       | Sample Size        | Fst    | Sample Size   | Fst    | Sample Size   | Fst    |                     |        |
| 1     | 24                 | 0.0519 | 12            | 0.0244 | 18            | 0.1386 | 22                  | 0.2    |
| 2     | 24                 | 0.021  | 12            | 0      | 16            | 0      | 20                  | 0.0361 |
| 3     | 26                 | 0.1525 | 10            | 0.0286 | 18            | 0.5    | 24                  | 0.25   |
| 4     | 26                 | 0.311  | 10            | 0.1765 | 18            | 0.7391 | 24                  | 0.3143 |
| 5     | 26                 | 0.1446 | 12            | 0.0345 | 18            | 0.0959 | 24                  | 0.0813 |
| 6     | 26                 | 0.2934 | 12            | 0      | 18            | 0.5    | 24                  | 0.0194 |
| 7     | 26                 | 0.2419 | 12            | 0.1538 | 18            | 0.5234 | 22                  | 0.4088 |
| 8     | 26                 | 0.0681 | 12            | 0.0244 | 18            | 0.1468 | 24                  | 0      |
| 9     | 26                 | 0.0276 | 12            | 0      | 18            | 0      | 24                  | 0.0538 |
| 10    | 26                 | 0.0769 | 12            | 0      | 18            | 0.0971 | 24                  | 0      |
| 11    | 26                 | 0.0534 | 12            | 0.0345 | 18            | 0.1226 | 22                  | 0.1043 |
| 12    | 26                 | 0.1478 | 12            | 0.0877 | 18            | 0.0902 | 24                  | 0.0559 |
| 13    | 24                 | 0.1167 | 12            | 0.0244 | 18            | 0.1081 | 24                  | 0.1607 |
| 14    | 24                 | 0.0614 | 6             | 0.2308 | 18            | 0.2105 | 22                  | 0.1111 |
| 15    | 26                 | 0.1265 | 12            | 0.1786 | 18            | 0.113  | 24                  | 0.0588 |
| 16    | 26                 | 0.299  | 12            | 0.1636 | 18            | 0.4958 | 24                  | 0.2787 |
| 17    | 26                 | 0.0968 | 12            | 0.2727 | 18            | 0.1148 | 24                  | 0.2593 |
| 18    | 26                 | 0.0831 | 12            | 0.0909 | 18            | 0.0412 | 24                  | 0      |
| 19    | 26                 | 0.2633 | 12            | 0.2    | 18            | 0.5714 | 24                  | 0.1429 |
| 20    | 24                 | 0.1276 | 12            | 0.2    | 18            | 0.2208 | 22                  | 0.3356 |
| 21    | 24                 | 0.2683 | 12            | 0.1475 | 18            | 0.25   | 22                  | 0.1789 |
| 22    | 26                 | 0      | 12            | 0      | 18            | 0      | 24                  | 0.1776 |
| 23    | 26                 | 0      | 12            | 0      | 18            | 0      | 24                  | 0      |
| 24    | 26                 | 0.1092 | 12            | 0      | 18            | 0.4    | 22                  | 0.4186 |
| 25    | 26                 | 0.1043 | 12            | 0      | 16            | 0.5    | 24                  | 0.0545 |
| 26    | 24                 | 0.1034 | 12            | 0.0909 | 18            | 0.2672 | 24                  | 0.1701 |
| 27    | 26                 | 0.086  | 12            | 0.0385 | 18            | 0.1527 | 22                  | 0.0361 |
| 28    | 26                 | 0      | 12            | 0      | 18            | 0.25   | 24                  | 0.5652 |
| 29    | 26                 | 0.1204 | 12            | 0.0943 | 18            | 0.5    | 24                  | 0.36   |
| Mean  | 26                 | 0.1307 | 12            | 0.0951 | 18            | 0.2428 | 23                  | 0.1733 |
