# Supplementary material
Source: MDPI journal article supplement (https://www.mdpi.com/1999-4907/10/4/334)
Supplement: s1 [file s1]

Table S6. The true K value was determined using both an estimate of the posterior probability of the data for a given K and the Evanno  $\Delta K$ [26, 27] in 13 *Liriodendron* provenances

|    | mean K    | STDEV      | L'K     | L"K     | L"K    | $\Delta K$ |
|----|-----------|------------|---------|---------|--------|------------|
| 1  | -3834.405 | 1.40318247 |         |         |        |            |
| 2  | -3161.625 | 0.48108977 | 672.78  | -604.36 | 604.36 | 1256.23124 |
| 3  | -3093.205 | 10.1272678 | 68.42   | -3.115  | 3.115  | 0.30758543 |
| 4  | -3027.9   | 2.19473053 | 65.305  | -54.245 | 54.245 | 24.7160183 |
| 5  | -3016.84  | 5.30584583 | 11.06   | -1.795  | 1.795  | 0.3383061  |
| 6  | -3007.575 | 7.76719654 | 9.265   | -9.52   | 9.52   | 1.22566745 |
| 7  | -3007.83  | 29.1551404 | -0.255  | -95.3   | 95.3   | 3.26872033 |
| 8  | -3103.385 | 50.7136987 | -95.555 | 32.045  | 32.045 | 0.63188055 |
| 9  | -3166.895 | 51.9469312 | -63.51  | 65.62   | 65.62  | 1.26321225 |
| 10 | -3164.785 | 37.4642605 | 2.11    | -9.96   | 9.96   | 0.26585337 |
| 11 | -3172.635 | 47.8796438 | -7.85   | -14.12  | 14.12  | 0.29490612 |
| 12 | -3194.605 | 42.684232  | -21.97  | 3.37    | 3.37   | 0.07895187 |
| 13 | -3213.205 | 44.6489992 | -18.6   |         |        |            |
