# Supplementary material
Source: MDPI journal article supplement (https://www.mdpi.com/1999-4907/10/4/334)
Supplement: s1 [file s1]

Table S3a. Nei's (1978) Unbiased Measures of Genetic Identity and Genetic distance based on eight Provinces.

|          | Hunan  | Zhejiang | Jiangxi | Anhui  | Hubei  | Sichuan | Guizhou | Yunnan | U.S.A |
|----------|--------|----------|---------|--------|--------|---------|---------|--------|-------|
| Hunan    | 1      |          |         |        |        |         |         |        |       |
| Zhejiang | 0.8606 | 1        |         |        |        |         |         |        |       |
| Jiangxi  | 0.8938 | 0.8693   | 1       |        |        |         |         |        |       |
| Anhui    | 0.8166 | 0.8316   | 0.8525  | 1      |        |         |         |        |       |
| Hubei    | 0.8361 | 0.7409   | 0.7256  | 0.7398 | 1      |         |         |        |       |
| Sichuan  | 0.8306 | 0.7733   | 0.7507  | 0.7287 | 0.9727 | 1       |         |        |       |
| Guizhou  | 0.8545 | 0.8015   | 0.7701  | 0.7439 | 0.8111 | 0.8235  | 1       |        |       |
| Yunnan   | 0.6493 | 0.592    | 0.6305  | 0.5647 | 0.7323 | 0.7221  | 0.6513  | 1      |       |
| U.S.A    | 0.3371 | 0.3181   | 0.3086  | 0.3723 | 0.34   | 0.3477  | 0.3387  | 0.2644 | 1     |

S3b. Nei's (1978) Unbiased Measures of Genetic Identity and Genetic distance based on 19 populations origins.

|            | Liuyang | Suining | Sangzhi | Songyang | Lushan | Wuyishan | Huangshan | Dabieshan | Exi region | Youyang | Xuyong | Liping | Songtao | Mengla | NC     | LA     | GE     | SC     | MO |
|------------|---------|---------|---------|----------|--------|----------|-----------|-----------|------------|---------|--------|--------|---------|--------|--------|--------|--------|--------|----|
| Liuyang    | 1       |         |         |          |        |          |           |           |            |         |        |        |         |        |        |        |        |        |    |
| Suining    | 0.7166  | 1       |         |          |        |          |           |           |            |         |        |        |         |        |        |        |        |        |    |
| Sangzhi    | 0.8353  | 0.6674  | 1       |          |        |          |           |           |            |         |        |        |         |        |        |        |        |        |    |
| Songyang   | 0.8848  | 0.6628  | 0.8267  | 1        |        |          |           |           |            |         |        |        |         |        |        |        |        |        |    |
| Lushan     | 0.7758  | 0.7213  | 0.8391  | 0.8423   | 1      |          |           |           |            |         |        |        |         |        |        |        |        |        |    |
| Wuyishan   | 0.6488  | 0.5522  | 0.7321  | 0.792    | 0.7785 | 1        |           |           |            |         |        |        |         |        |        |        |        |        |    |
| Huangshan  | 0.789   | 0.4344  | 0.726   | 0.7801   | 0.805  | 0.543    | 1         |           |            |         |        |        |         |        |        |        |        |        |    |
| Dabieshan  | 0.5208  | 0.4186  | 0.6406  | 0.6455   | 0.6369 | 0.7667   | 0.5357    | 1         |            |         |        |        |         |        |        |        |        |        |    |
| Exi region | 0.8535  | 0.7454  | 0.7477  | 0.7409   | 0.677  | 0.7352   | 0.5637    | 0.7046    | 1          |         |        |        |         |        |        |        |        |        |    |
| Youyang    | 0.765   | 0.7681  | 0.7365  | 0.7698   | 0.6676 | 0.7033   | 0.5336    | 0.6179    | 0.9567     | 1       |        |        |         |        |        |        |        |        |    |
| Xuyong     | 0.742   | 0.6654  | 0.8291  | 0.7195   | 0.701  | 0.7235   | 0.5673    | 0.6934    | 0.9133     | 0.879   | 1      |        |         |        |        |        |        |        |    |
| Liping     | 0.7835  | 0.7354  | 0.7042  | 0.7359   | 0.6316 | 0.5621   | 0.4692    | 0.5271    | 0.7166     | 0.7206  | 0.6896 | 1      |         |        |        |        |        |        |    |
| Songtao    | 0.7505  | 0.651   | 0.7888  | 0.7486   | 0.7536 | 0.7306   | 0.6076    | 0.7581    | 0.7858     | 0.7645  | 0.7561 | 0.7271 | 1       |        |        |        |        |        |    |
| Mengla     | 0.5938  | 0.6213  | 0.6463  | 0.592    | 0.5907 | 0.6256   | 0.3882    | 0.5799    | 0.7323     | 0.6961  | 0.6954 | 0.5393 | 0.667   | 1      |        |        |        |        |    |
| NC         | 0.4004  | 0.4205  | 0.4212  | 0.398    | 0.368  | 0.3588   | 0.3056    | 0.4775    | 0.4579     | 0.4439  | 0.4338 | 0.4168 | 0.5079  | 0.3393 | 1      |        |        |        |    |
| LA         | 0.2653  | 0.3099  | 0.2051  | 0.2218   | 0.2181 | 0.1611   | 0.2402    | 0.2059    | 0.2665     | 0.2267  | 0.2184 | 0.2402 | 0.2595  | 0.1487 | 0.7993 | 1      |        |        |    |
| GE         | 0.2827  | 0.2761  | 0.266   | 0.3233   | 0.2722 | 0.1882   | 0.2615    | 0.3517    | 0.3286     | 0.3276  | 0.3005 | 0.2765 | 0.3182  | 0.2094 | 0.8303 | 0.7885 | 1      |        |    |
| SC         | 0.2616  | 0.2152  | 0.2263  | 0.221    | 0.2265 | 0.1692   | 0.2259    | 0.2027    | 0.21       | 0.2211  | 0.2342 | 0.1907 | 0.1993  | 0.1599 | 0.8264 | 0.883  | 0.8373 | 1      |    |
| MO         | 0.2556  | 0.2132  | 0.2892  | 0.2525   | 0.251  | 0.315    | 0.2595    | 0.3072    | 0.2773     | 0.2682  | 0.2895 | 0.1764 | 0.2683  | 0.284  | 0.6962 | 0.5937 | 0.7407 | 0.7817 | 1  |
