# Supplementary material
Source: MDPI journal article supplement (https://www.mdpi.com/1999-4907/10/4/334)
Supplement: s1 [file s1]

Table S1. Origins information for the *Liriodendron chinense* and *Liriodendron tulipifera* samples used in this study.

| ID    | Number | Origins Locality         | Latitude | Longitude |
|-------|--------|--------------------------|----------|-----------|
| 1     | 3      | Liuyang, Hunan Prov.     | 28°10'N  | 113°39'E  |
| 2     | 2      | Suining, Hunan Prov.     | 26°35'N  | 110°09'E  |
| 3     | 3      | Youyang, Sichuan Prov.   | 28°50'N  | 108°46'E  |
| 4     | 4      | Songyang, Zhejiang Prov. | 28°27'N  | 119°28'E  |
| 5     | 3      | Liping, Guizhou Prov.    | 26°14'N  | 109°08'E  |
| 6     | 1      | Huangshan, Anhui Prov.   | 30°21'N  | 117°56'E  |
| 7     | 3      | Sangzhi, Hunan Prov.     | 29°24'N  | 110°09'E  |
| 8     | 3      | Lushan, Jiangxi Prov.    | 29°33'E  | 116.01'E  |
| 9     | 3      | Xuyong, Sichuan Prov.    | 28°09'N  | 105°26'E  |
| 10    | 2      | Exi region Hubei Prov.   | 32°08'N  | 111°55'E  |
| 11    | 3      | Songtao, Guizhou Prov.   | 28°15'N  | 109°30'E  |
| 12    | 3      | Mengla, Yunan Prov.      | 21°27'N  | 101°34'E  |
| 13    | 1      | Wuyishan, Jiangxi Prov.  | 27°31'N  | 116°59'E  |
| 14    | 1      | Dabieshan, Anhui Prov.   | 31°10'N  | 115°46'E  |
| 15    | 3      | North Carolina, U.S.A    | 35°38'N  | 79°12'W   |
| 16    | 1      | Louisiana, U.S.A         | 31°09'N  | 92°22'W   |
| 17    | 3      | Georgia, U.S.A           | 32°47'N  | 83°41'W   |
| 18    | 3      | South Carolina, U.S.A    | 33°42'N  | 80°35'W   |
| 19    | 3      | Missouri, U.S.A          | 38°43'N  | 92°44'W   |
| Total | 48     |                          |          |           |
